# Supplementary material for: Academic Primer Series: Five Key Papers about Team Collaboration Relevant to Emergency Medicine
Source: PubMed Central journal article supplement (PMC5305141; doi:10.5811/westjem.2016.11.31212), 2017-01-20
Supplement: wjem-18-303-s001.pdf [file wjem-18-303-s001.pdf]

**Appendix A: A Worksheet for Junior Faculty Members based on Kotter’s Eight Steps of Leading Change**

| Kotter’s Step                                                 | Questions for the Project Team & Leader                                                                                                         | Specific Application to Your Project |
|---------------------------------------------------------------|-------------------------------------------------------------------------------------------------------------------------------------------------|--------------------------------------|
| 1) Establishing a sense of urgency                            | What are the latest or upcoming problems that are creating a sense of urgency for this change? (e.g. accreditation, resident suggestions, etc.) |                                      |
| 2) Forming a powerful guiding coalition                       | Who are your key stakeholders? Who are people who have the ability to support or prevent your change from happening?                            |                                      |
| 3) Creating a vision                                          | What is your vision? What does your innovation or project help you to create?                                                                   |                                      |
| 4) Communicating the vision                                   | How are you going to communicate your vision?                                                                                                   |                                      |
| 5) Empowering others to act on the vision                     | How are you going to engage your stakeholders in your implementation process to achieve your vision?                                            |                                      |
| 6) Planning for and creating short-term wins                  | What are some early ‘wins’ that you can identify for your team?<br><br>What defines early success?                                              |                                      |
| 7) Consolidating improvements and producing still more change | What is your continual quality improvement structure look like?<br><br>What is the project’s take on program evaluation?                        |                                      |

|                                             |                                                                                                                                                                             |  |
|---------------------------------------------|-----------------------------------------------------------------------------------------------------------------------------------------------------------------------------|--|
| <p>8) Institutionalizing new approaches</p> | <p>What are tasks related to your project that you can begin to make 'routine' and 'normal'?</p> <p>How can you align your project to current institutional structures?</p> |  |
|---------------------------------------------|-----------------------------------------------------------------------------------------------------------------------------------------------------------------------------|--|
